# Supplementary material
Source: PubMed Central journal article supplement (PMC7357538)
Supplement: mmc1.pdf [file mmc1.pdf]

A

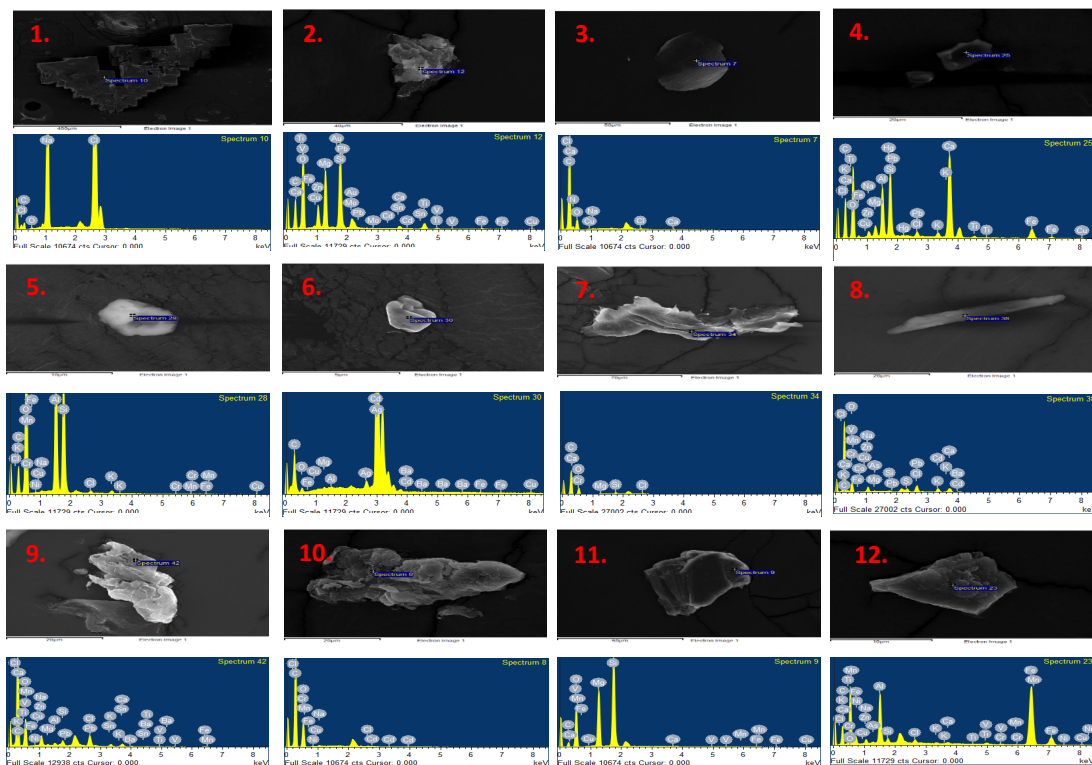

B

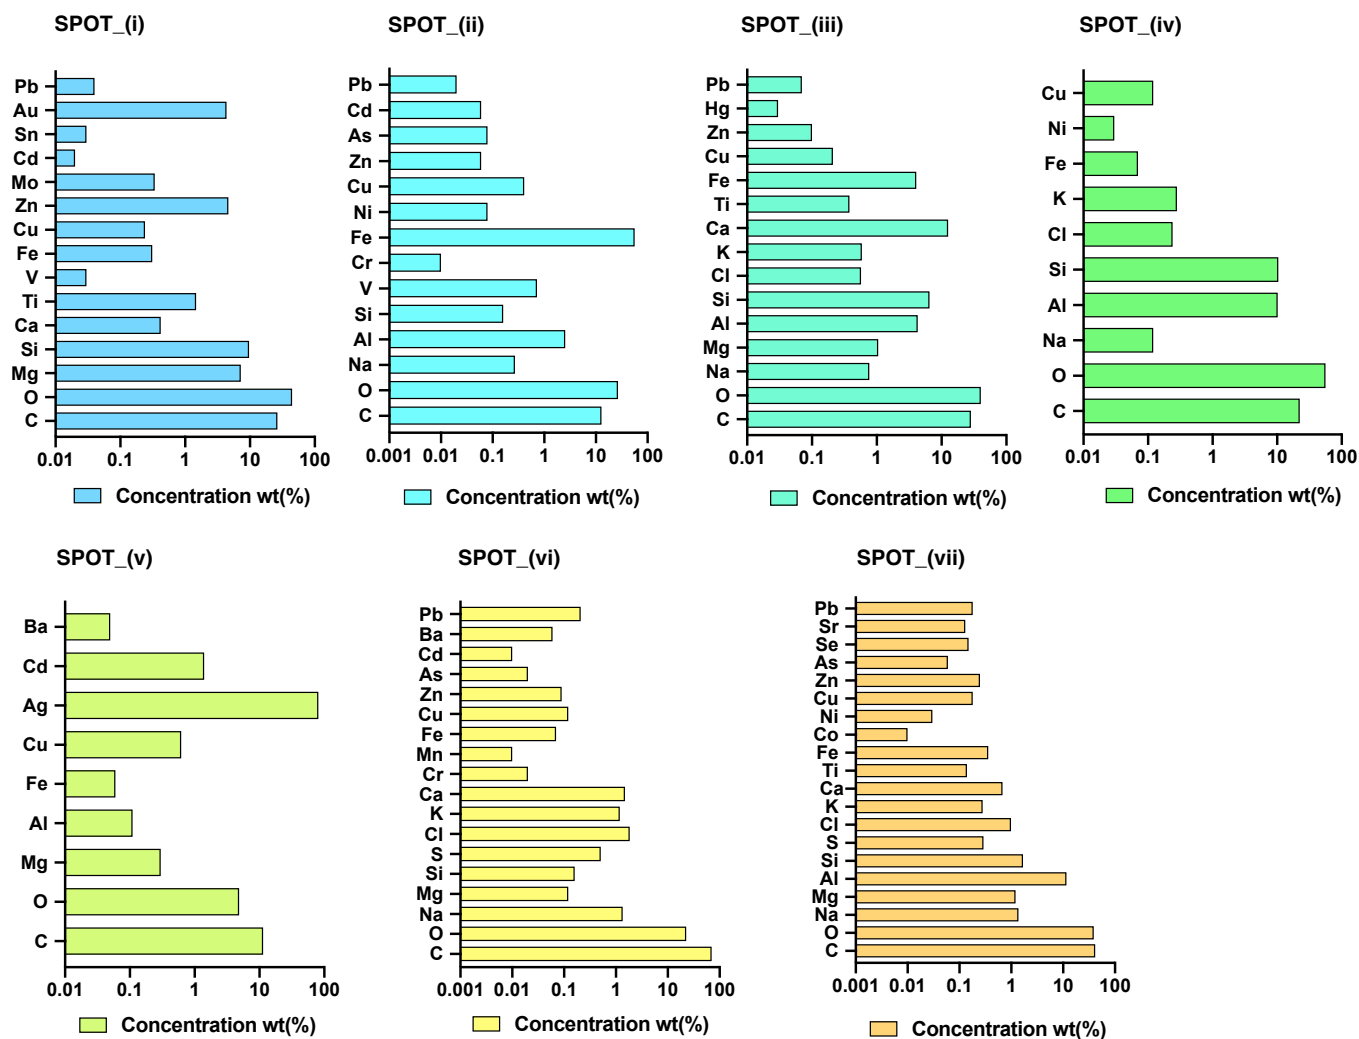

**Supplementary Figure 1: SEM-EDS analysis of PM<sub>10</sub>.** Scanning electron images and energy – dispersive X-ray spectra of coarse airborne particulate matter PM<sub>10</sub>. (A) 12 different spots of PM<sub>10</sub> shows 12 different types of spectral peaks corresponding to the presence of specific elements at that point. (B) Representation of elemental composition (% weight) of PM<sub>10</sub> at few other spots in bar graph having metal name on *y-axis* and respective concentration (%weight) on *x-axis*.

A

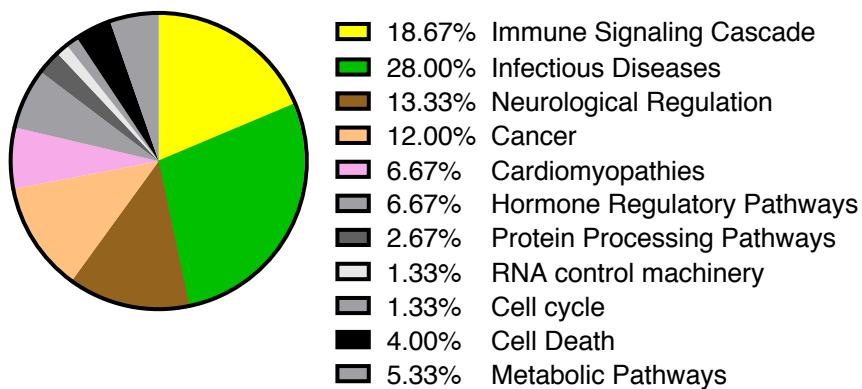

B

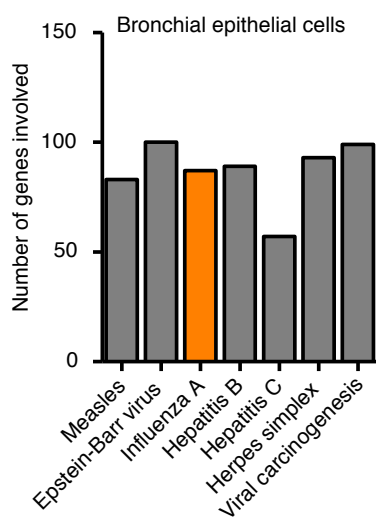

C

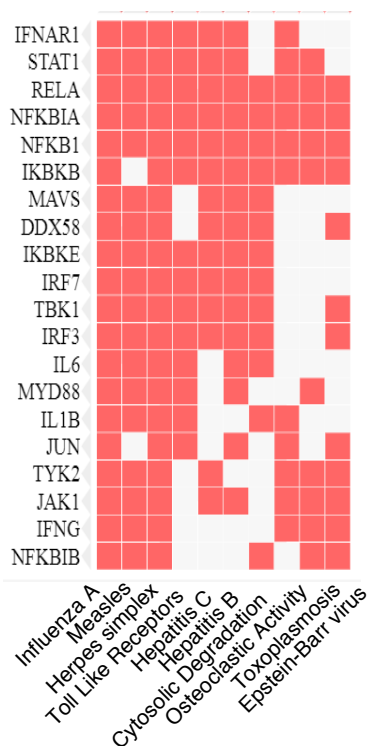

D

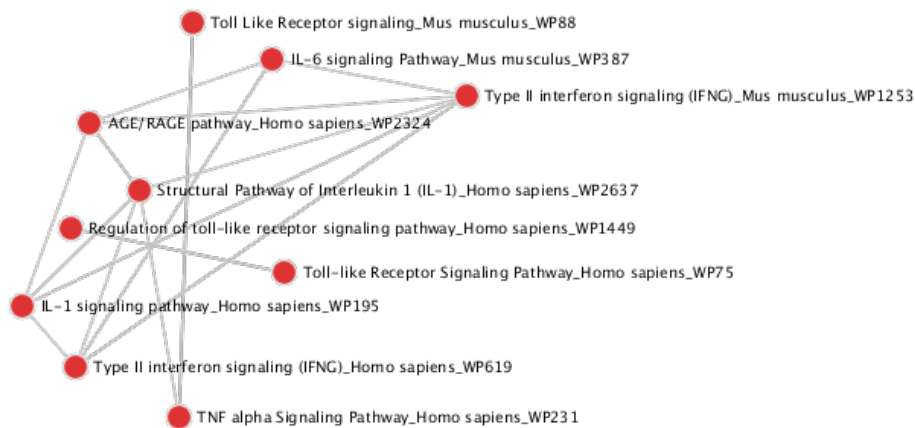

**Supplementary Figure 2: Re-analysis of GEO dataset GSE27973** – (A) Cellular pathways dysregulated in presence of CSE (cigarette smoke extract) exposure and RV (rhinovirus) infection in human bronchial epithelial cells. (B) Number of genes involved in various diseases. (C) Exact gene plotted against the disease in which it is involved, represented by the heat map generated through the Enrichr software. (D) Connecting network between the pathways dysregulated, represented by the dot network analysis generated through the Enrichr software.



**Supplementary Figure 3: Gene Ontology analysis of PM<sub>10</sub> treated and H5N1 infected A549 cells** – (A) Gene Ontology analysis represented by the chord plot that connects the common differentially expressed genes with the top significantly enriched ontology terms. (B-E) Quantification (measured by qRT-PCR) of the expression levels of metabolic pathways-related transcripts: *VIPR1*, *CYP1A1*, *ALDH1A3* and *PPP1R14A* in A549 cells exposed with PM<sub>10</sub> (labelled as PM; corresponds to PM(I) dosage form - details are mentioned in the methods section) and infected with NDV. Sample labeled as untreated (control), mock NDV infected (NDV) and PM<sub>10</sub> exposed plus NDV infected (NDV+PM). Data are mean +/- SEM of triplicate samples from single experiment and are representative of three independent experiments. \*\*\* $P < 0.001$ , \*\* $P < 0.01$  and ns = non-significant by one-way ANOVA Tukey test and unpaired t-test.



**Supplementary Figure 4: Re-analysis of GEO dataset GSE27973 to depict the pathways and genes upregulated in presence of CSE and RV infection** – Enrichr software is used for the depiction of related genes and pathways. (A) Representation of enriched pathways by bar graph. (B) Representation of upregulated genes involved in enriched pathways by heat map. (C) Representation of upregulated genes involved in various diseases by heat map. Here, human bronchial epithelial cell lines were exposed to CSE (cigarette smoke extract) and infected with RV (rhinovirus).





**Supplementary Figure 5: Re-analysis of GEO dataset GSE34607 to depict the modulation of metabolic pathways-related genes in BEAS-2B bronchial epithelial cells in presence PM<sub>10</sub> -**

(A) Heat map showing the expression of top most differentially expressed genes (based on the adjusted *p* -values) at varied time points upon exposure to PM<sub>10</sub> in BEAS-2B cell compared with mock (untreated) cells. (B) Heat map showing the modulation of inflammatory genes via *NFκB* pathway.
